# Supplementary material for: Multiple cone pathways are involved in photic regulation of retinal dopamine
Source: PubMed Central journal article supplement (PMC4928117; doi:10.1038/srep28916), 2016-06-30
Supplement: srep28916-s1.pdf [file srep28916-s1.pdf]

## Supplementary Information

### Multiple cone pathways are involved in photic regulation of retinal dopamine

Sheng-Nan Qiao<sup>1,2</sup>, Zhijing Zhang<sup>3</sup>, Christophe P. Ribelayga<sup>3,4</sup>, Yong-Mei Zhong<sup>1,5,6\*</sup>, and Dao-Qi Zhang<sup>2\*</sup>

<sup>1</sup>*Institutes of Brain Science, Fudan University, Shanghai 200032, China*

<sup>2</sup>*Eye Research Institute, Oakland University, Rochester, MI 48309, USA*

<sup>3</sup>*Ruiz Department of Ophthalmology and Visual Science, The University of Texas Health Science Center at Houston, Houston, TX 77030, USA*

<sup>4</sup>*Graduate School of Biomedical Sciences, The University of Texas Health Science Center at Houston, Houston, TX 77030, USA*

<sup>5</sup>*State Key Laboratory of Medical Neurobiology, Fudan University, Shanghai 200032, China;*

<sup>6</sup>*Collaborative Innovation Center for Brain Science, Fudan University, Shanghai 200032, China*

\*Co-corresponding author: zhang@oakland.edu or ymzhong@fudan.edu.cn

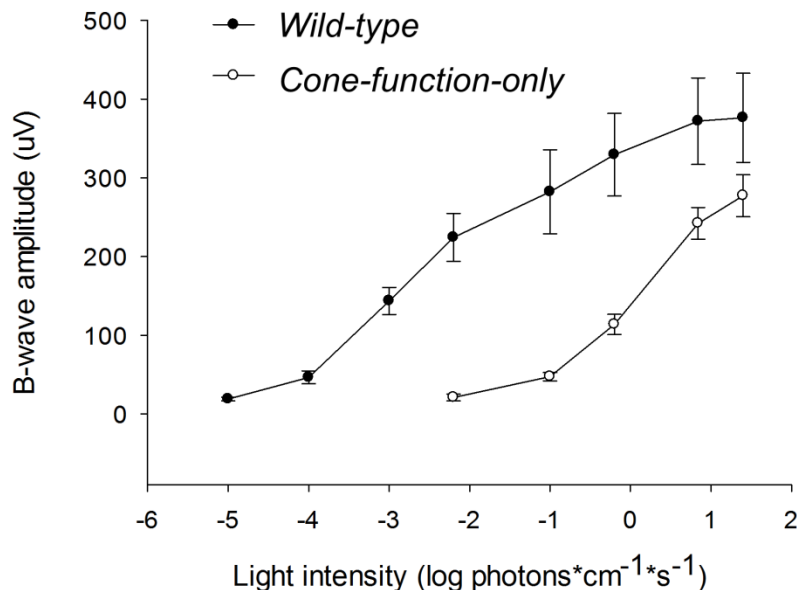

**Figure S1. Loss of rod function is evidenced by reduced sensitivity of dark-adapted electroretinogram (ERG) b-wave in cone-function-only mice.**

Mouse ERGs were recorded using an Espion-III ERG system and software (Diagnosys LLC, Lowell, MA). After 1 hour of dark adaptation, mouse pupils were dilated by sequential

application of 1% tropicamide and 2.5% phenylephrine eye drops. Anesthesia was induced by a single intraperitoneal injection of 50 mg/kg ketamine HCl and 7 mg/kg xylazine. A sequence of 5 ms white light flashes were given to evoke the ERG at intensities ranging from  $-5 \log$  photons/cm<sup>2</sup>·s to  $1.4 \log$  photons/cm<sup>2</sup>·s. The b-wave amplitude was measured from the maximum a-wave peak to the maximum b-wave peak. The intensity–response curve of the mean b-wave amplitudes of 3 wild-type mice (closed circles) and 3 cone-function-only mice (open circles) are shown. The intensity-response curve of cone-function-only mice was shifted to the right by more than 3 log units, indicating that rod function is lost in this mouse line.

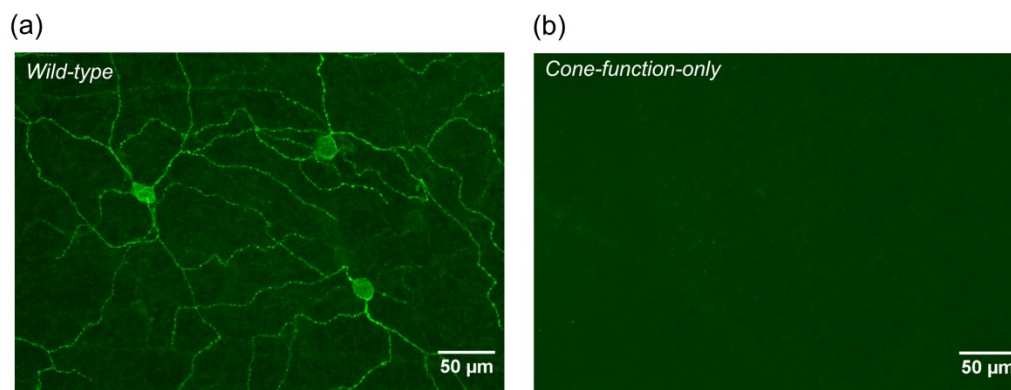

**Figure S2. No melanopsin immunostaining was detected in retinas of cone-function-only mice.**

Whole retinas were blocked for two hours with 1% bovine serum albumin (Fisher Scientific, Hampton, NH) and 0.3% Triton-X 100 (Sigma, St. Louis, MO) in 0.1x PBS. Retinas were incubated with a primary antibody against melanopsin (1:10,000; AB-N38, Advanced Targeting Systems, San Diego, CA). Retinas were then rinsed in 0.1x PBS and incubated for 2 hours with a secondary antibody raised in donkey, conjugated to AlexaFluor-488 (1:500; Life Technologies; Carlsbad, CA). Finally, whole retinas were mounted on slides with Vectashield Hard-Set mounting solution (Vector Laboratories, Burlingame, CA). Melanopsin-positive cells were observed in a wild-type retina (**a**) but not in a cone-function-only retina (**b**). These experiments were repeated with identical results in 3 wild-type mice and 3 cone-function-only mice.

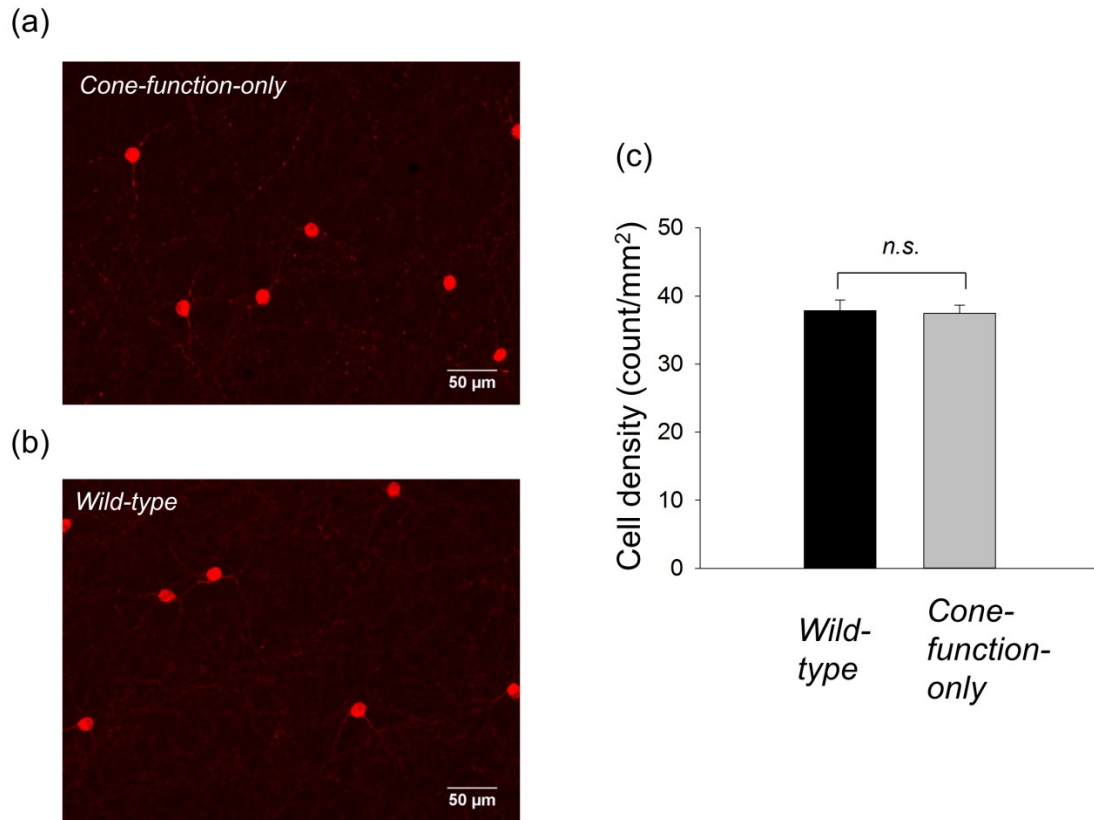

**Figure S3. Loss of rod and melanopsin function does not change the number of DACs in the retina.**

The same procedures used for melanopsin immunostaining in Figure S2 were used for TH immunostaining in this figure. The primary antibody against TH was used at a concentration of 1:1000 (AB1542, EMD Millipore, Billerica, MA). **(a)**: TH staining in a cone-function-only retina. **(b)**: TH staining in a wild-type retina. **(c)**: The TH-expressing cell density in retinas of wild-type mice ( $37.9 \pm 1.5$  /mm<sup>2</sup>, n = 3) remained unchanged in retinas of cone-function-only mice ( $37.5 \pm 1.2$  /mm<sup>2</sup>, n = 3; student *t*-test, P = 0.835).

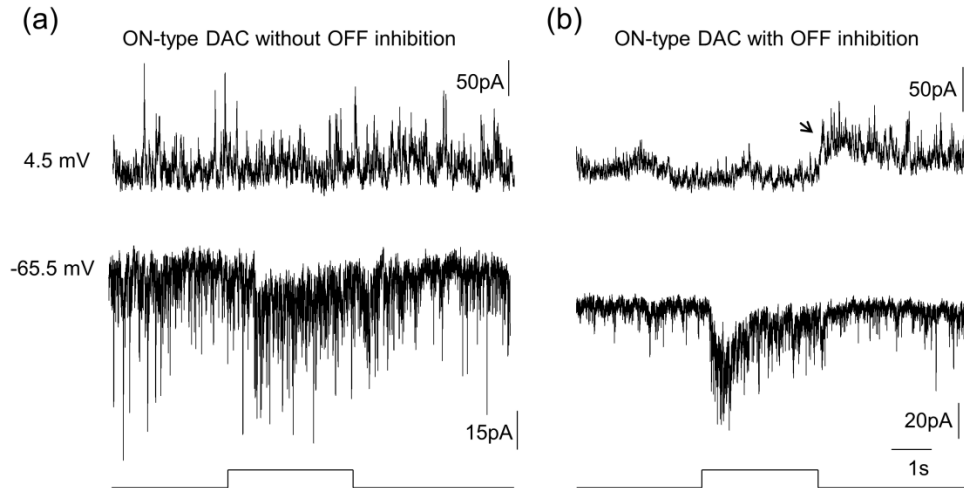

**Figure S4. The majority of DACs that only have excitatory ON responses at -65.6 mV show OFF inhibition at 4.5 mV.**

**(a)** A DAC exhibited a light-evoked inward current at -65.5 mV but no detectable current at 0 mV, suggesting it is an ON cell. **(b)** A DAC showed an excitatory ON response at -65.5 mV and an inhibitory OFF response at 4.5 mV, indicating this ON cell receives OFF inhibition. Stimulation bar under each panel shows timing of a 470-nm light pulse. Light stimulus duration was 3 s.

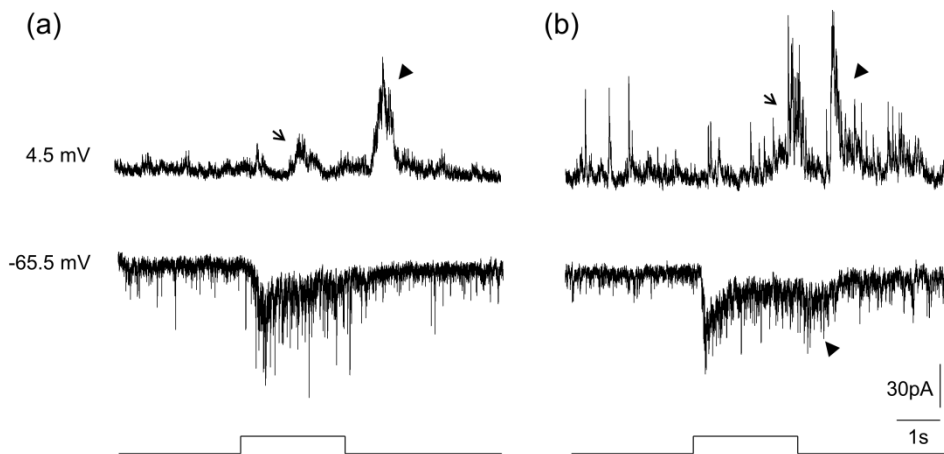

**Figure S5. DAC cells without d-ON inhibition at -65.5 mV show d-ON inhibition at 4.5 mV.**

**(a)** A DAC showed an excitatory ON response at -65.5 mV but d-ON (indicated by an arrow) and OFF (indicated by an arrowhead) inhibitions at 4.5 mV, suggesting that this ON cell receives ON and OFF inhibition. **(b)** A DAC that had excitatory ON and inhibitory OFF responses at -65.5 mV exhibited inhibitory ON (indicated by an arrow) and OFF (indicated by an

arrowhead) inhibitions at 4.5 mV. Stimulation bar under each panel shows timing of a 470-nm light pulse. Light stimulus duration was 3 s.

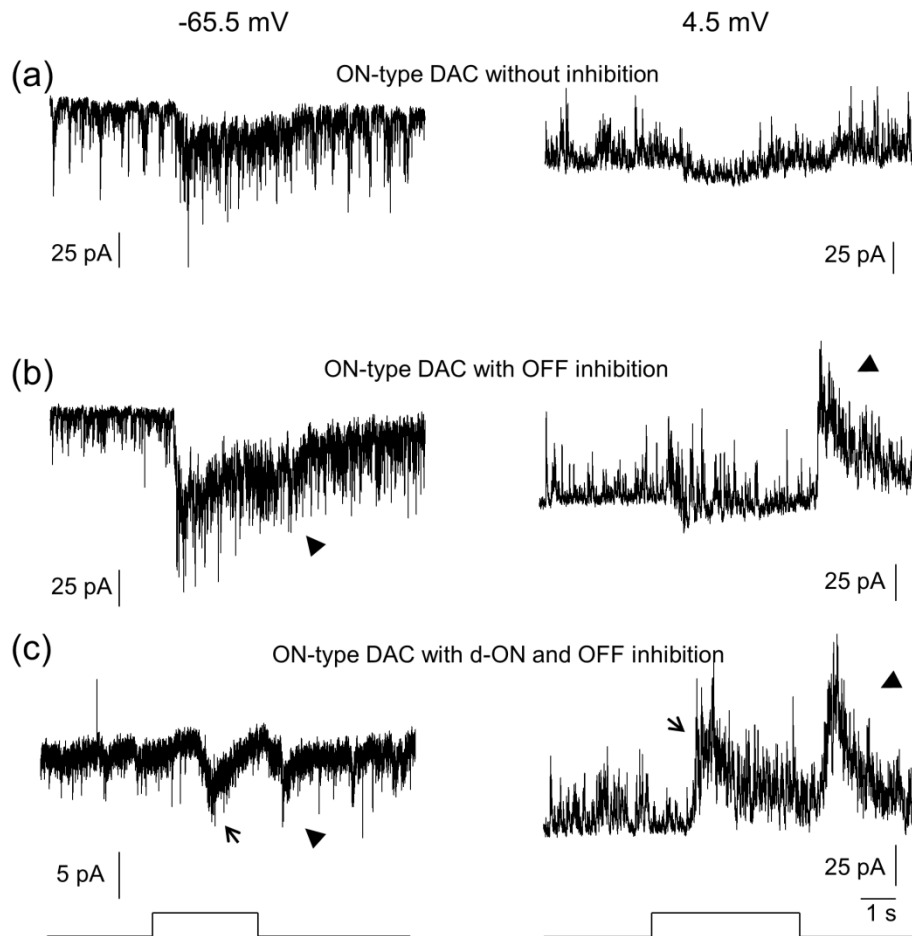

**Figure S6. Three classes of light responses of DACs recorded in *wild-type* mice.**

Voltage-clamp recordings were made from DACs in retinas of wild-type mice with a mixed C57BL/129 background at the holding potentials of -65.5 mV and 4.5 mV, respectively. **(a)** A DAC displayed a relatively large inward current at -65.5 mV (left trace) and a small amplitude inward current at 4.5 mV (right trace) at light onset ( $n = 3$ ). **(b)** A DAC exhibited ON and OFF (indicated by an arrowhead) responses at both -65.5 mV (left trace) and 4.5 mV (right trace) ( $n = 4$ ). **(c)** d-ON (indicated by arrows) and OFF (indicated by arrowheads) responses were observed in a DAC at both -65.5 mV (left trace) and 0 mV (right trace) in the presence of TTX and L-AP4. Stimulation bar under each panel shows timing of a 470-nm light pulse. Light stimulus duration was 3 s for traces at -65.5 mV and 4 s for traces at 4.5 mV.
